# Supplementary material
Source: PubMed Central journal article supplement (PMC6449412)

A WT OE1 OE3

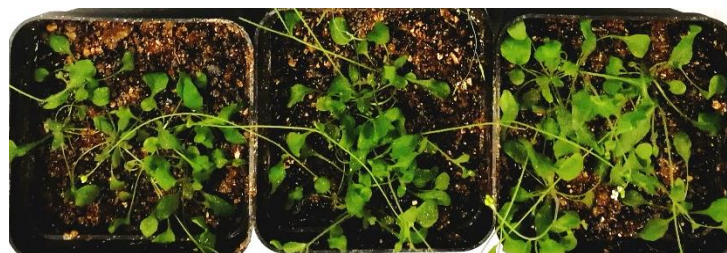

B

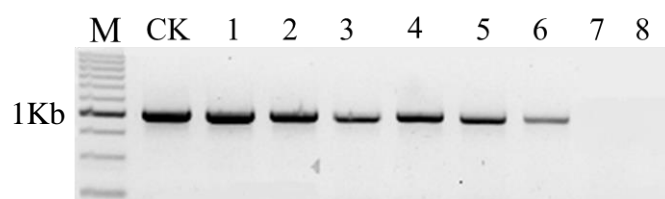

C

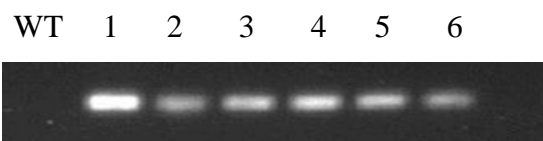

Supplement: 13205_2019_1673_MOESM1_ESM.pdf [file 13205_2019_1673_MOESM1_ESM.pdf]
